# Supplementary material
Source: PubMed Central journal article supplement (PMC10133196)
Supplement: NIHMS1881506-supplement-Supplementary_Figures.pdf [file NIHMS1881506-supplement-Supplementary_Figures.pdf]

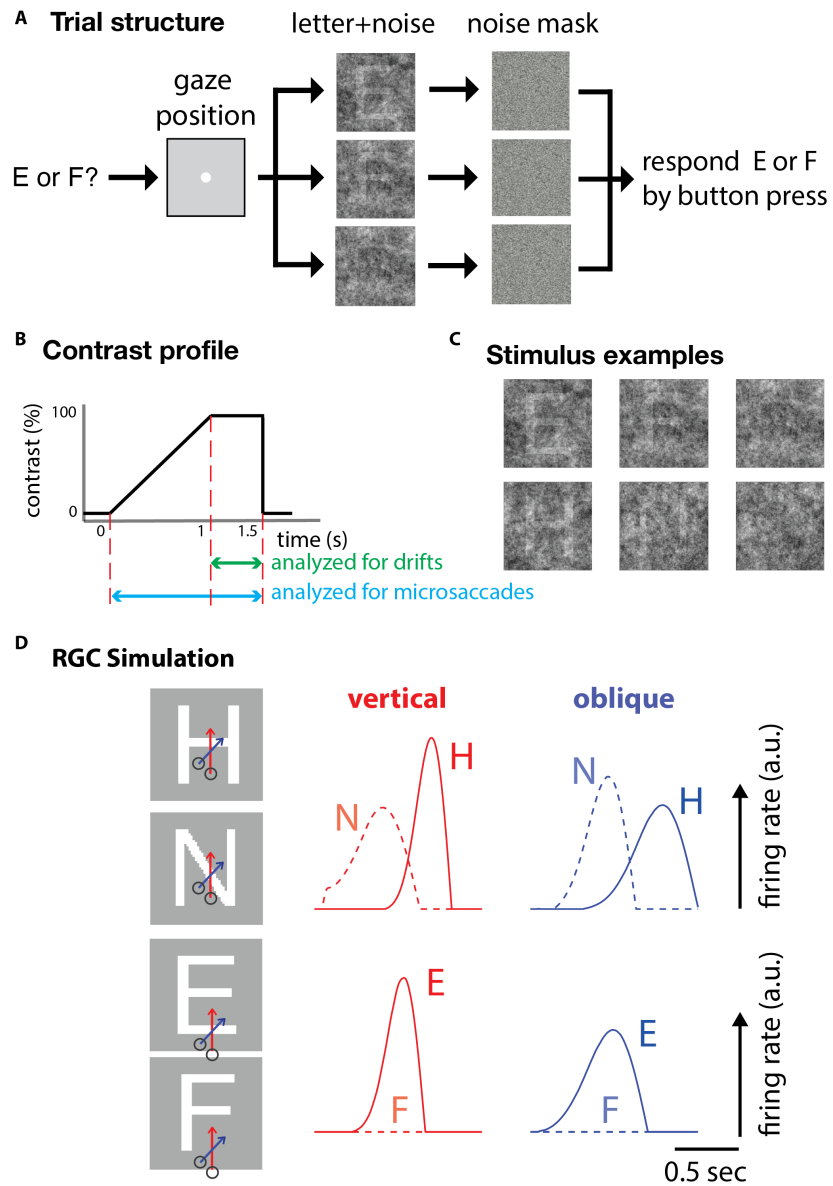

**Figure S1: Task structure and model RGC responses, Related to STAR Methods and Figure 1** (A) The trial structure of the letter discrimination task. (B) The contrast ramp used in each trial. (C) Stimulus examples. Top row shows E, F, and letter-absent; bottom row shows H, N, and letter-absent. (D) Simulated firing profiles of an RGC moving across the letters. The size of the modeled receptive field center is indicated by the circle at the beginning of each trajectory; surround radius is four times larger. Eye motion was simulated as a vertical movement (moving from bottom to the top) or oblique movement (moving from lower left to upper right) at a constant speed at 0.5 deg/sec for 0.8 sec.

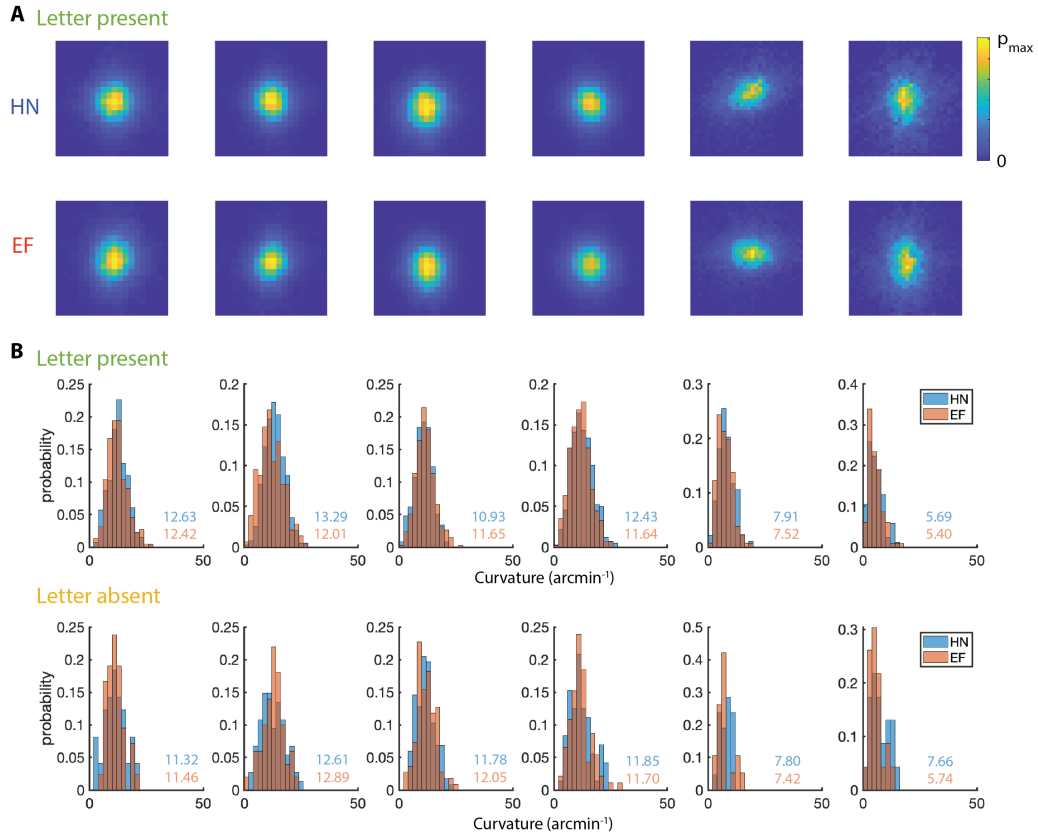

**Figure S2: Drift velocity heatmap, drift orientations, and curvatures, Related to Figure 2** (A) Drift velocity distribution of each subject (S1-6 from left to right) from HN trials (top) and EF trials (bottom), with letter-present. Region shown is  $2^\circ$  per second square for S1 to S4 and  $3^\circ$  per second square for S5 and S6. Color bar maximum ( $p_{\max}$ ) is 0.0366 for S1 to S4, 0.0163 for S5, and 0.0121 for S6. (B) Histograms of mean curvatures of each trial from HN trials and EF trials, with letter-present (top) and letter-absent (bottom). There was no difference in the distribution of curvature values for HN vs. EF conditions within any subject (two-tailed Wilcoxon signed rank test,  $p > 0.05$  for each subject individually), and there was no difference in mean curvature values between the two trial types across subjects (two-tailed paired t-test,  $p > 0.05$ ). Numbers in each subpanel indicate mean curvature for each condition, in  $\text{arcmin}^{-1}$ .

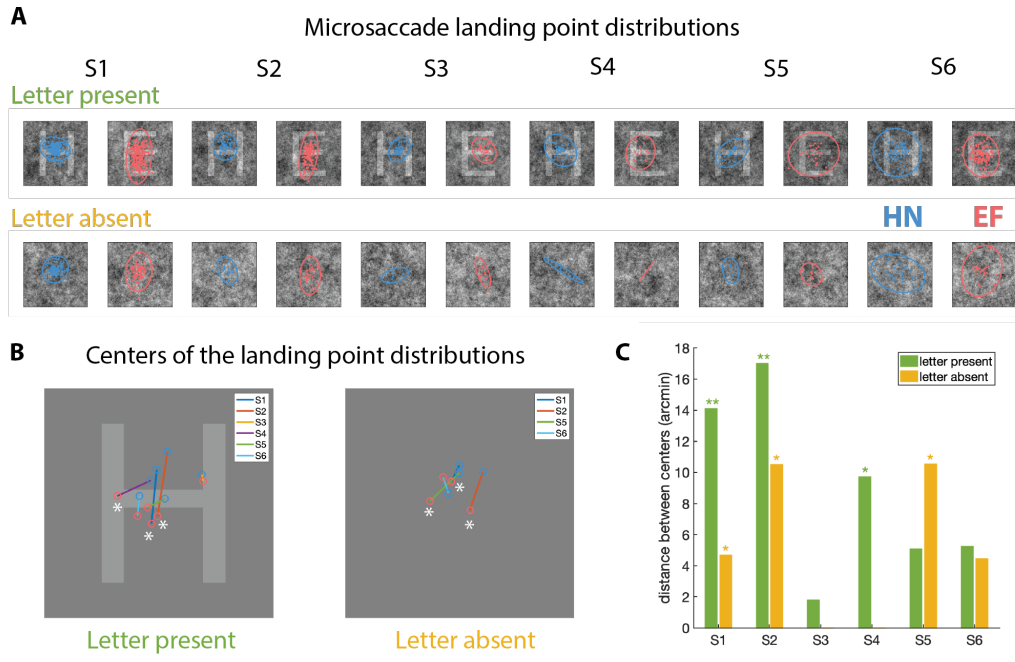

**Figure S3: Comparison of microsaccade landing points between HN and EF blocks, Related to Figure 2** (A) Microsaccade landing points on each target, along with minimum-area ellipses covering 95% of the landing points. (B) Centers of landing point ellipses in HN trials (blue circles) and EF trials (red circles). \* labels the statistically-significant differences (see panel C for significance level). (C) Euclidean distances between the centers of HN and EF distributions. Green: letter-present trials. Orange: letter-absent trials. Null distributions obtained by shuffling and significant difference are represented by \* as  $p < 0.05$  and \*\* as  $p < 0.01$ . No data are shown for letter-absent trials of subjects 3 & 4 because of the low number of microsaccades (see Table S1). Similar results were observed for microsaccade starting positions.

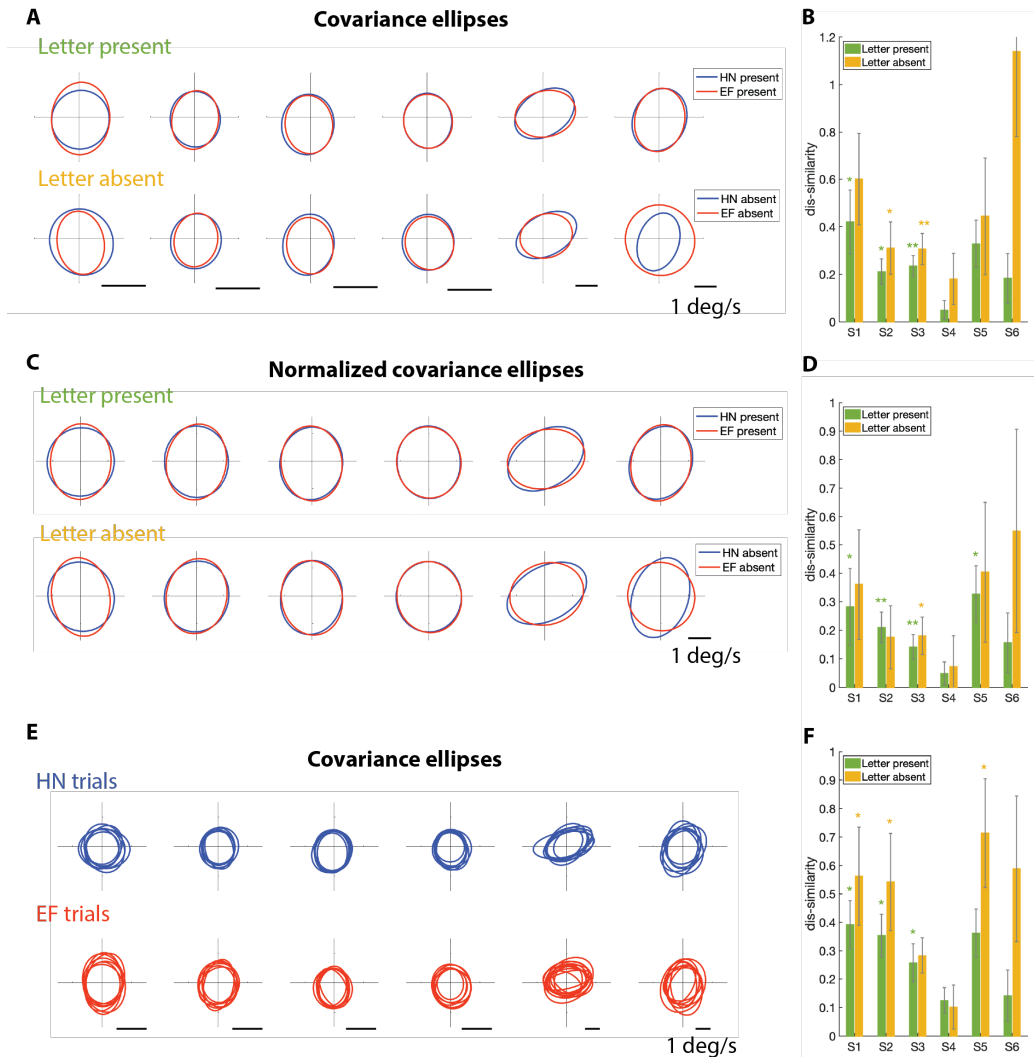

**Figure S4: Additional drift analysis and statistics, Related to Figure 2 (A-D)** Drift velocity statistics with 100-ms holdout from non-drift eye movements (A) Top: Drift velocity covariance ellipses from trials in HN block (blue) and EF block (red) superimposed. Bottom: Same as top panel but from letter-absent trials. (B) Dis-similarity between HN and EF covariance ellipses from six subjects. Green: letter-present trials. Orange: letter-absent trials. (Error bars: 1 standard deviation. \*  $p < 0.05$ , \*\*  $p < 0.01$ ) (C & D) The same analysis applied to covariance ellipses after normalizing to the same total area. **(E-F) Balanced block shuffling** (E) Drift velocity covariance ellipses from each block. (F) Dis-similarity statistics between HN and EF covariance ellipses from six subjects.

| Data type      | Letter | Stimulus | S1  | S2  | S3  | S4  | S5  | S6  |
|----------------|--------|----------|-----|-----|-----|-----|-----|-----|
| trials         | HN     | present  | 451 | 433 | 360 | 377 | 142 | 172 |
|                |        | blank    | 127 | 115 | 110 | 72  | 42  | 37  |
|                | EF     | present  | 443 | 416 | 412 | 342 | 172 | 114 |
|                |        | blank    | 99  | 103 | 107 | 66  | 37  | 32  |
| drift segments | HN     | present  | 265 | 379 | 352 | 418 | 91  | 81  |
|                |        | blank    | 47  | 67  | 116 | 71  | 20  | 21  |
|                | EF     | present  | 198 | 242 | 407 | 419 | 125 | 111 |
|                |        | blank    | 40  | 36  | 110 | 88  | 16  | 19  |
| microsaccades  | HN     | present  | 170 | 55  | 36  | 38  | 30  | 67  |
|                |        | blank    | 80  | 16  | 4   | 4   | 8   | 30  |
|                | EF     | present  | 232 | 125 | 28  | 12  | 102 | 26  |
|                |        | blank    | 85  | 32  | 11  | 3   | 21  | 11  |

**Table S1: Summary of the numbers of trials given conditions in all six subjects, Related to STAR Methods** Number of trials, drift segments, and microsaccades free from artifacts.
